# Supplementary material for: The Use of E-Cigarettes among High School Students in Poland Is Associated with Health Locus of Control but Not with Health Literacy: A Cross-Sectional Study
Source: MDPI journal article supplement (doi:10.3390/toxics10010041), 2022-01-17
Supplement: s1 [file s1]

**Items of the questionnaire used in the analysis presented in the article**

Date \_\_\_\_\_

Place of survey (School, Address)

Gender

- ☐ female
- ☐ male

Age \_\_\_\_\_ years

Class at school \_\_\_\_\_ (1, 2, 3 or 4?)

Education of your mother (legal guardian)

- ☐ primary
- ☐ vocational
- ☐ secondary
- ☐ university

Education of your father (legal guardian)

- ☐ primary
- ☐ vocational
- ☐ secondary
- ☐ university

Place of residence

- ☐ urban above 400,000 inhabitants
- ☐ urban from 200,000 to 400,000 inhabitants
- ☐ urban from 100,000 to 200,000 inhabitants
- ☐ urban from 10,000 to 100,000 inhabitants
- ☐ urban below 10,000 inhabitants
- ☐ rural

What is the size of accommodation (flat/house) you live?

- ☐ below 30 m<sup>2</sup>
- ☐ from 31 m<sup>2</sup> to 50 m<sup>2</sup>
- ☐ from 51 m<sup>2</sup> to 70 m<sup>2</sup>
- ☐ from 71 m<sup>2</sup> to 90 m<sup>2</sup>
- ☐ above 90 m<sup>2</sup>

What is your number of siblings? \_\_\_\_\_ persons

What is marital status of your parents/guardians?

- ☐ married
- ☐ informal
- ☐ divorced or in separation
- ☐ one of parents died
- ☐ both parents died

Has your family received some type of external support/help?

- ☐ financial
- ☐ material
- ☐ in the form of service
- ☐ we have not received any external help

How do you assess financial situation of your family?

- ☐ very good
- ☐ good
- ☐ average

- ☐ bad
- ☐ very bad

How much do you spend montly on your mobile phone?

- ☐ below 5 PLN
- ☐ 5 – 10 PLN
- ☐ 10 – 30 PLN
- ☐ 30 – 50 PLN
- ☐ above 50 PLN
- ☐ I have not got mobile phone

How many books (without textbooks and e-books) are there in at your home?

- ☐ no book collection
- ☐ not more than 25 books
- ☐ 26 – 50 books
- ☐ 51 – 100 books
- ☐ 101 – 500 books
- ☐ above 500 books

Do you use the Internet?

- ☐ yes
- ☐ no

How often do you use the Internet?

- ☐ everyday
- ☐ several times a week
- ☐ once a week
- ☐ several times monthly but not each week
- ☐ not more often than once monthly

How many hours do you use the Internet in a week?

- ☐ not more than 2 hours
- ☐ more than 2 hours but not more than 7 hours
- ☐ more than 7 hours but not more than 14 hours
- ☐ more than 14 hours but not more than 21 hours
- ☐ more than 21 hours but not more than 35 hours
- ☐ more than 35 hours

Have you ever used e-cigarettes?

- ☐ yes
- ☐ no

When have you used e-cigarettes the last time?

- ☐ in the last week
- ☐ in the last month
- ☐ in the last three months
- ☐ in the last year
- ☐ more than year ago

Have you ever smoked traditional cigarettes?

- ☐ yes
- ☐ no

When have you smoked cigarettes the last time?

- ☐ in the last week
- ☐ in the last month
- ☐ in the last three months
- ☐ in the last year
- ☐ more than year ago

☐ ponad rok temu
